# Supplementary material for: Rational design of dual-functional surfaces on polypropylene with antifouling and antibacterial performances via a micropatterning strategy
Source: Royal Society of Chemistry journal article supplement (doi:10.1039/d1tb02778f), 2022-01-01
Supplement: d1tb02778f1.pdf [file d1tb02778f1.pdf]

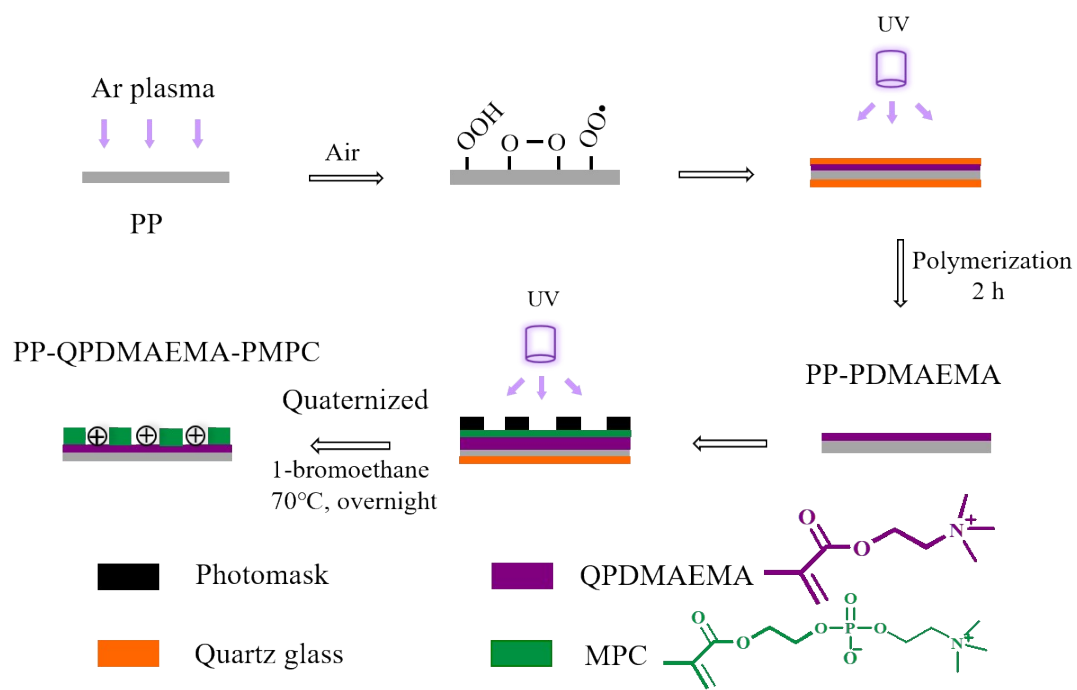

**Figure S1** Schematic diagram of preparation of PP-QPDMAEMA-PMPC 5  $\mu\text{m}$ .

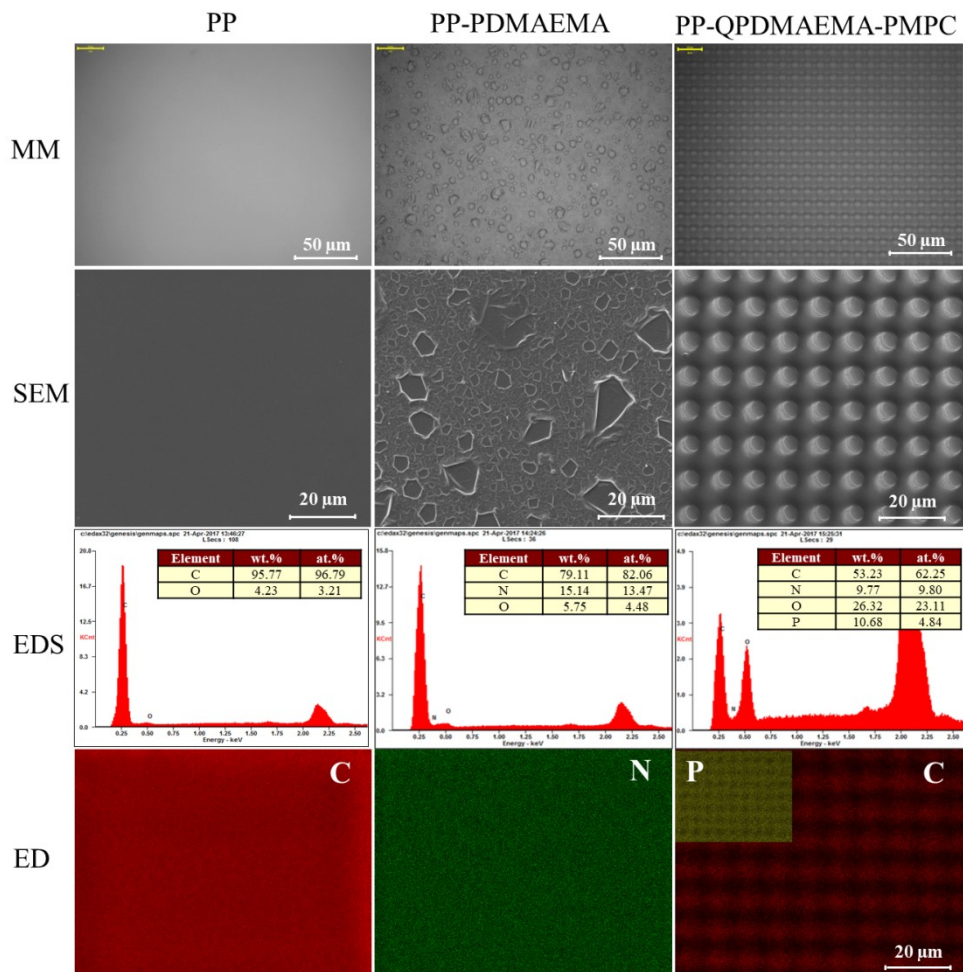

**Figure S2** MM images, SEM images, SEM-EDS spectra and ED (element distribution) of the PP, PP-PDMAEMA and PP-QPDMAEMA-PMPC 5 μm samples.

As shown in Figure S2, the PP film has a smooth surface and mainly contains C element (red). Compared with the PP, the surface coating of PP-PDMAEMA was obvious, and the characteristic element N of PDMAEMA molecule was evenly distributed on the surface (green). On the surface of PP-QPDMAEMA-PMPC 5 μm, a regular and patterned distribution of PMPC characteristic element P was found, indicating that a 5 μm schematic microscopic pattern was successfully constructed on the surface.

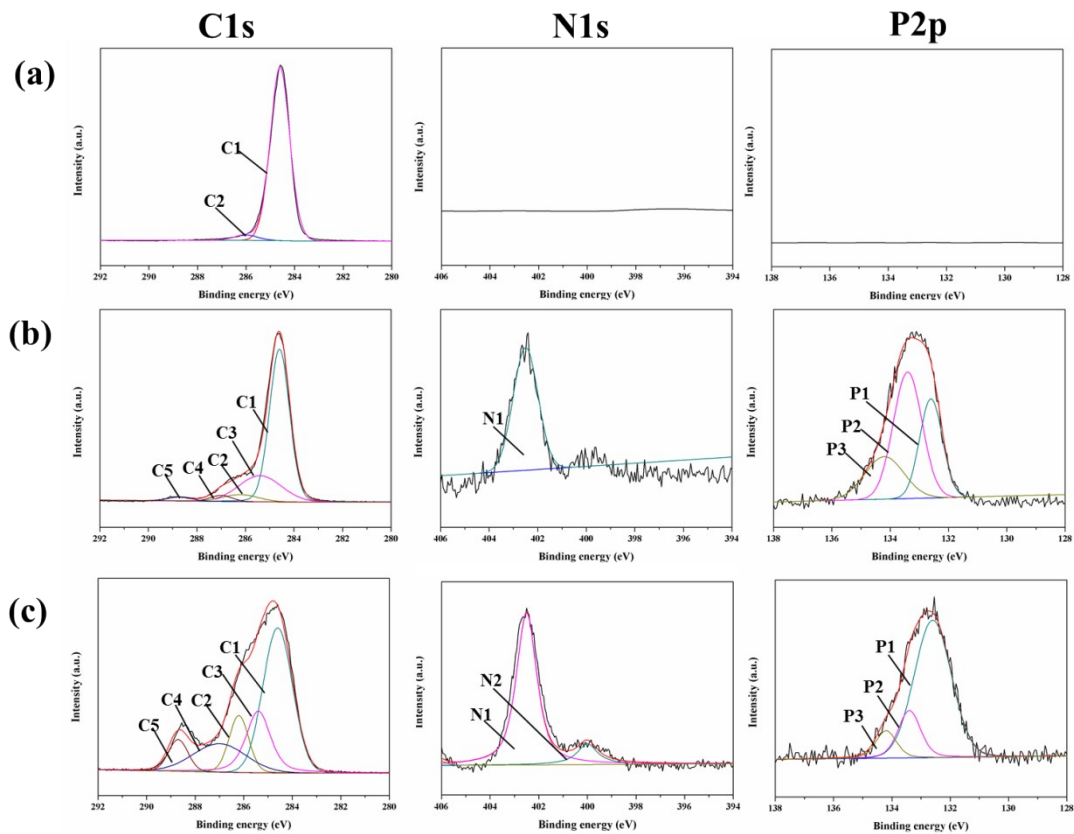

**Figure S3** XPS core-level spectra of characteristic elements for (a) PP, (b) PP-PMPC and (c) PP-PMPC-QPDMAEMA 5  $\mu\text{m}$ .

Split the peaks of C, N, and P in the XPS full spectrum of each sample, and obtain the XPS core-level spectra as shown in Figure 3S. The C1s spectrum of the pristine PP contains a large amount of C-C/C-H (284.6 eV) (C1 in Figure S3 (a)) and a small amount of C-O (286.2 eV) (C2 in Figure S3 (a)). The PP-PMPC sample (Figure S3 (b)) has obvious peaks at 284.6 eV (C1), 286.2 eV (C2), 285.4 eV (C3), 287.0 eV (C4), 288.7 eV (C5), of which 284.6 eV corresponds to C-C/C-H, and 286.2 eV corresponds to C-O. And 285.4 eV, 287.0 eV, 288.7 eV correspond to C-N, C=O and O-C=O in the MPC molecule, respectively. The N1s spectrum shows a clear peak at 402.5 eV (N1), which corresponds to the C-N<sup>+</sup> in the MPC molecule. The P2p spectrum has obvious characteristic peaks at 132.6 eV (P1), 133.4 eV (P2), and 134.2

eV (P3), which correspond to P=O, P-O and O-P-O in the MPC molecule, respectively. The above results fully indicate that the PMPC molecular layer was successfully grafted on the surface of PP. The peak intensities of PP-PMPC-QPDMAEMA sample (Figure S3(c)) at 285.4 eV, 286.2 eV, 287.0 eV and 288.7 eV in the C1s spectrum increased significantly, because QPDMAEMA also contains the corresponding C-N, C-O, C=O and O-C=O. In addition, the N1s of PP-PMPC-QPDMAEMA not only retains the C-N<sup>+</sup> at 402.5 eV, but also has a relatively small peak at 400.0 eV, which is attributed to the C-N in PDMAEMA. This is because when PDMAEMA is quaternized, the degree of quaternization cannot be guaranteed to be 100%, so the surface layer of the sample still contains a small amount of unquaternized C-N.

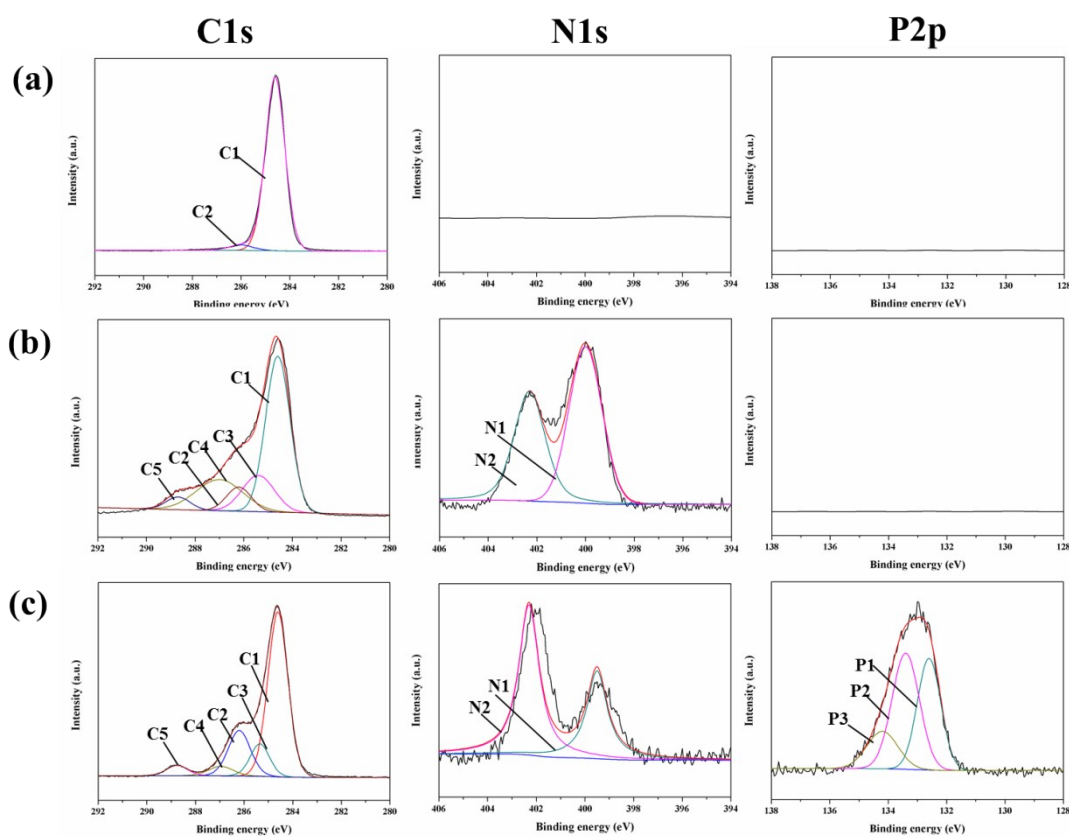

**Figure S4** XPS core-level spectra of characteristic elements for (a) PP, (b) PP-PDMAEMA and (c) PP-QPDMAEMA-PMPC 5  $\mu\text{m}$ .

The C, N, and P peaks in the XPS full spectrum of the PP-QPDMAEMA-PMPC 5  $\mu\text{m}$  sample are split, and the resulting XPS single spectrum is shown in Figure S5. The C1s spectrum of the pristine PP contains a large amount of C-C/C-H (284.6 eV) (C1 in Figure S5(a)) and a small amount of C-O (286.2 eV) (C2 in Figure S5(a)). The C1s spectrum of the PP-PDMAEMA sample showed obvious peaks at 284.6 eV (C1), 286.2 eV (C2), 285.4 eV (C3), 287.0 eV (C4), 288.7 eV (C5), of which 284.6 eV corresponds to for C-C/C-H, 286.2 eV corresponds to C-O, while 285.4 eV, 287.0 eV, and 288.7 eV correspond to C-N, C=O, and O-C=O in the DMAEMA molecule, respectively. For the N1s spectrum, an obvious peak appears at 400.0 eV, which corresponds to the C-N in the DMAEMA molecule. The C1s spectrum of the PP-QPDMAEMA-PMPC sample still shows peaks at 286.2 eV, 287.0 eV and 288.7 eV, because PMPC also contains the corresponding C-O, C=O and O-C=O. The P2p spectrum has obvious characteristic peaks at 132.6 eV (P1), 133.4 eV (P2), and 134.2 eV (P3), which correspond to P=O, P-O and O-P-O in the MPC molecule, respectively. In addition, the N1s of the PP-QPDMAEMA-PMPC sample showed an obvious peak at 402.5 eV (N2), which corresponds to the C-N<sup>+</sup> in the MPC molecule, and there was also a relatively small peak at 400.0 eV, which was attributed to the C-N in PDMAEMA. The above results indicate that the PP-QPDMAEMA-PMPC 5  $\mu\text{m}$  bifunctional patterned microstructure was successfully grafted onto the PP surface.

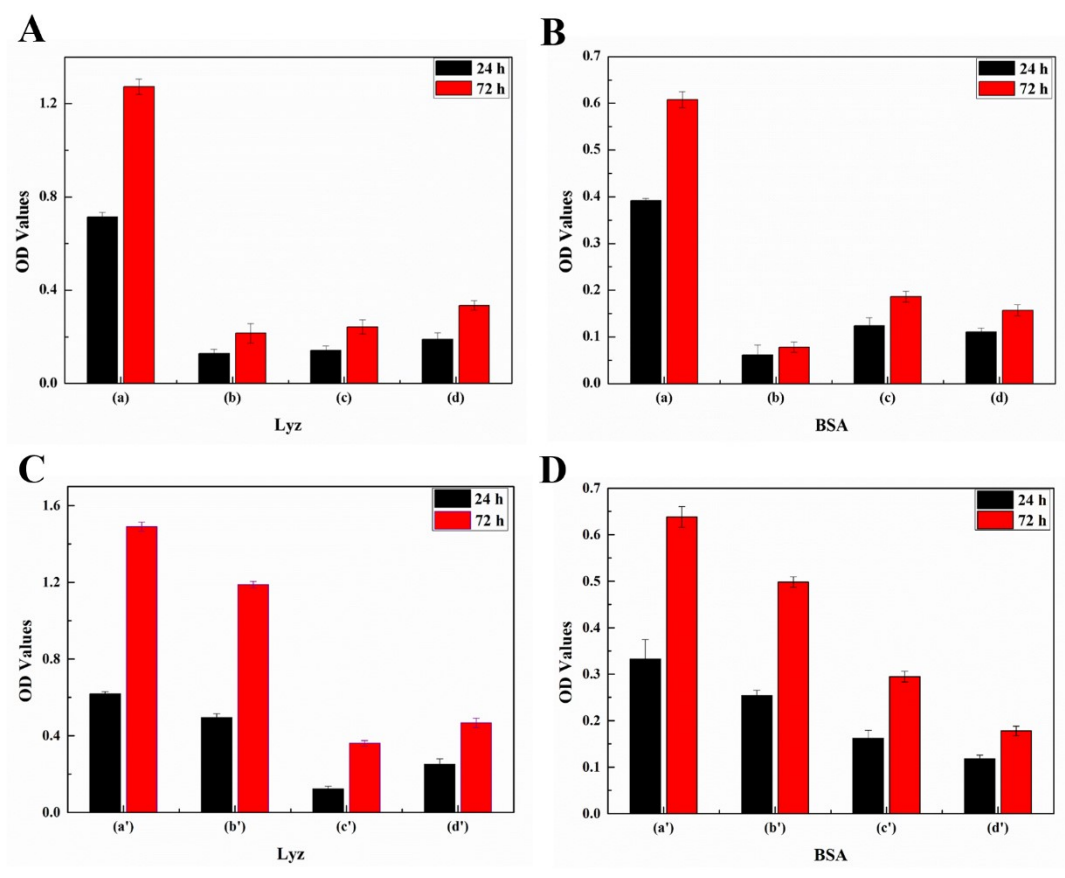

**Figure S5** OD values of protein adsorption of Lyz (A, C) and BSA (B, D) on different PP samples after 24 h and 72 h. (a) PP, (b) PP-PMPC, (c) PP-PMPC-QPDMAEMA 5  $\mu\text{m}$ , (d) PP-PMPC-PDMAAEMA 5  $\mu\text{m}$ . (a') PP, (b') PP-PDMAEMA, (c') PP-QPDMAEMA-PMPC 5  $\mu\text{m}$ , (d') PP-PDMAEMA-PMPC 5  $\mu\text{m}$ . Each data point stand for the mean and standard deviation of three parallel samples.

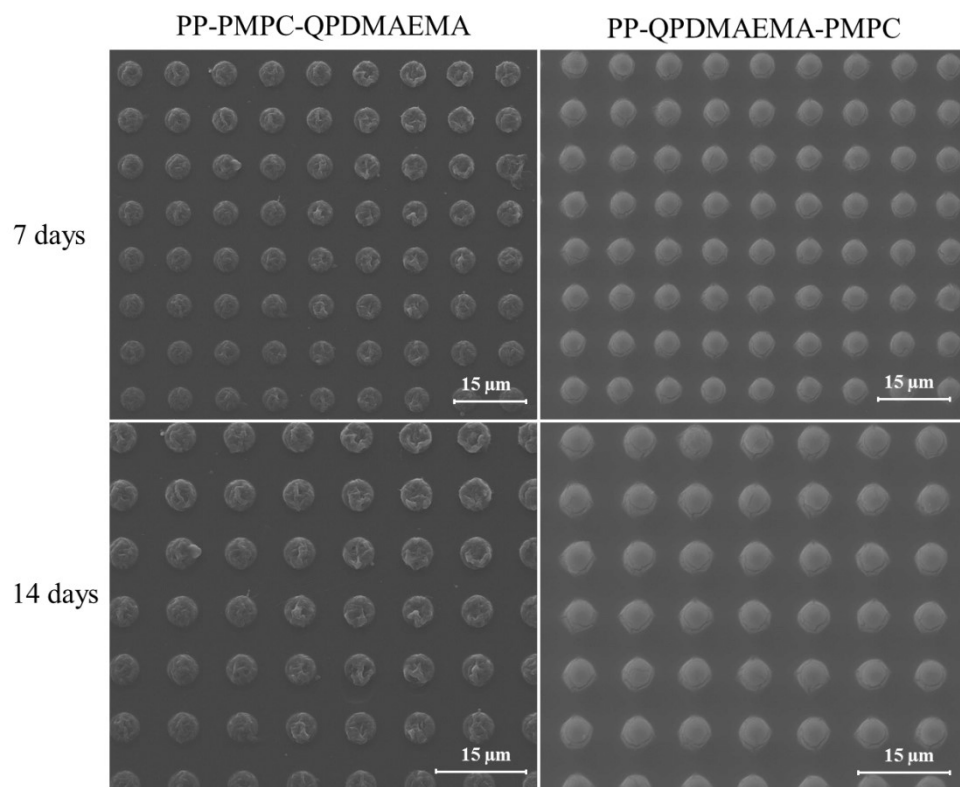

**Figure S6** SEM images of PP-PMPC-QPDMAEMA 5 μm and PP-QPDMAEMA-PMPC 5 μm soaked in PBS at 37°C for different times.

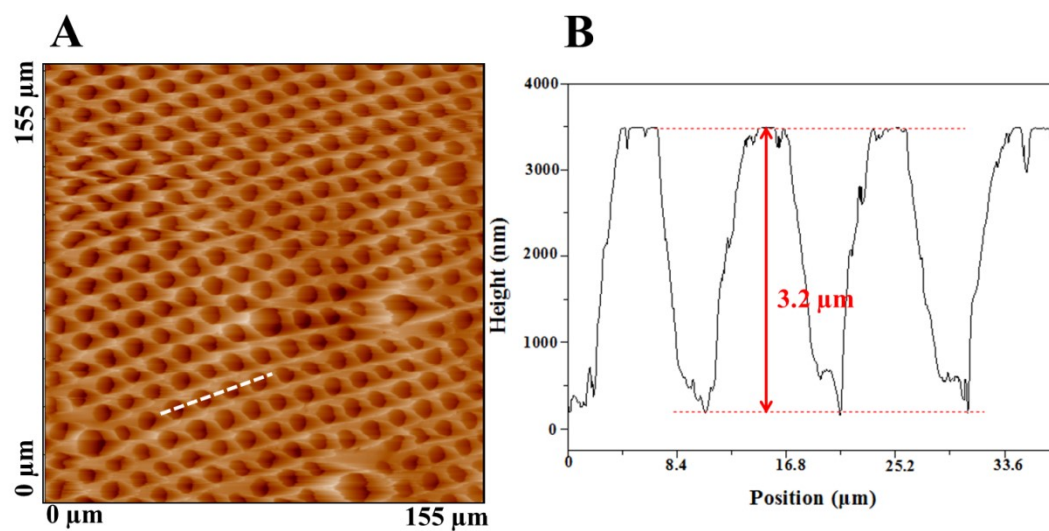

**Figure S7** AFM image (A) and the corresponding height profile (B) of PP-PMPC-QPDMAEMA 5 μm.
